# Supplementary material for: Assessing private provider perceptions and the acceptability of video observed treatment technology for tuberculosis treatment adherence in three cities across Viet Nam
Source: PubMed Central journal article supplement (PMC8104441; doi:10.1371/journal.pone.0250644), 2021-05-07
Supplement: pone.0250644.s001.pdf [file pone.0250644.s001.pdf]

**S1 Table: Cronbach's alpha (reliability coefficient)**

| <b>Constructs of healthcare intervention acceptability and their components</b> | <b>Item-test correlation</b> | <b>Item-rest correlation</b> | <b>Average interitem covariance</b> | <b>Cronbach's alpha</b> |
|---------------------------------------------------------------------------------|------------------------------|------------------------------|-------------------------------------|-------------------------|
| <b>Ethicality<sup>a</sup></b>                                                   |                              |                              |                                     |                         |
| Belief that observation is best strategy for adherence                          | 0.588                        | 0.510                        | 0.214                               | <b>0.865</b>            |
| Willingness to test new approaches                                              | 0.436                        | 0.362                        | 0.227                               | <b>0.871</b>            |
| <b>Intervention Coherence<sup>a</sup></b>                                       |                              |                              |                                     |                         |
| Identify side effects faster                                                    | 0.646                        | 0.570                        | 0.209                               | <b>0.863</b>            |
| Identify people at risk of stopping treatment faster                            | 0.594                        | 0.536                        | 0.220                               | <b>0.865</b>            |
| <b>Burden<sup>b</sup></b>                                                       |                              |                              |                                     |                         |
| Time requirement from doctor                                                    | 0.632                        | 0.551                        | 0.209                               | <b>0.864</b>            |
| Time requirement from patient                                                   | 0.616                        | 0.547                        | 0.214                               | <b>0.864</b>            |
| <b>Opportunity Cost<sup>a</sup></b>                                             |                              |                              |                                     |                         |
| Save time for doctor                                                            | 0.717                        | 0.655                        | 0.205                               | <b>0.859</b>            |
| Save money for doctor                                                           | 0.557                        | 0.473                        | 0.216                               | <b>0.867</b>            |
| <b>Perceived Effectiveness<sup>a</sup></b>                                      |                              |                              |                                     |                         |
| Help in providing differentiated care                                           | 0.647                        | 0.585                        | 0.214                               | <b>0.863</b>            |
| Help patients adhere to treatment                                               | 0.592                        | 0.528                        | 0.218                               | <b>0.865</b>            |
| <b>Self-Efficacy<sup>a</sup></b>                                                |                              |                              |                                     |                         |
| Confidence monitoring treatment through VOT                                     | 0.586                        | 0.516                        | 0.217                               | <b>0.865</b>            |
| Confidence providing differentiated care through VOT                            | 0.565                        | 0.504                        | 0.221                               | <b>0.866</b>            |
| <b>Affective Attitude<sup>a</sup></b>                                           |                              |                              |                                     |                         |
| Addresses problems which patients face                                          | 0.553                        | 0.472                        | 0.217                               | <b>0.867</b>            |
| Be beneficial for doctor's practice and patients                                | 0.674                        | 0.615                        | 0.212                               | <b>0.861</b>            |
| Be relevant for all of doctor's TB patients                                     | 0.562                        | 0.493                        | 0.219                               | <b>0.866</b>            |
| <b>Implementation/Usability<sup>a</sup></b>                                     |                              |                              |                                     |                         |
| Doctor's concerns about patient confidentiality                                 | 0.377                        | 0.260                        | 0.227                               | <b>0.879</b>            |
| Doctor's comfort with receiving support from study staff                        | 0.489                        | 0.413                        | 0.224                               | <b>0.869</b>            |
| <b>Total</b>                                                                    |                              |                              | 0.217                               | <b>0.873</b>            |

<sup>a</sup>: 1 (Strongly Disagree) to 5 (Strong Agree)

<sup>b</sup>: 1 (Very Difficult) to 5 (Very Easy)
