# Supplementary material for: Assessing private provider perceptions and the acceptability of video observed treatment technology for tuberculosis treatment adherence in three cities across Viet Nam
Source: PubMed Central journal article supplement (PMC8104441; doi:10.1371/journal.pone.0250644), 2021-05-07
Supplement: pone.0250644.s003.pdf [file pone.0250644.s003.pdf]

**S3 Table: Constructs of acceptability associated with the willingness to use VOT in HCMC**

| Constructs of healthcare intervention acceptability and their components | Would use VOT (n= 19) |               | Would not use VOT (n=15) |               | Mann-Whitney U test |
|--------------------------------------------------------------------------|-----------------------|---------------|--------------------------|---------------|---------------------|
|                                                                          | Median (IQR)          | Mean (95%CI)  | Median (IQR)             | Mean (95%CI)  |                     |
| <b>Ethicality<sup>a</sup></b>                                            |                       |               |                          |               |                     |
| Belief that observation is best strategy for adherence                   | 4 (3-4)               | 3.7 (3.1-4.2) | 4 (2-4)                  | 3.5 (2.9-4.0) | 0.416               |
| Willingness to test new approaches                                       | 4 (4-4)               | 3.8 (3.4-4.2) | 4 (3-4)                  | 3.7 (3.3-4.1) | 0.475               |
| <b>Intervention Coherence<sup>a</sup></b>                                |                       |               |                          |               |                     |
| Identify side effects faster                                             | 4 (3-4)               | 3.5 (3.1-3.9) | 2 (2-4)                  | 2.7 (2.2-3.3) | <b>0.032</b>        |
| Identify people at risk of stopping treatment faster                     | 4 (3-4)               | 3.6 (3.3-3.9) | 4 (3-4)                  | 3.5 (3.1-3.9) | 0.883               |
| <b>Burden<sup>b</sup></b>                                                |                       |               |                          |               |                     |
| Time requirement from doctor                                             | 2 (1-3)               | 2.3 (1.8-2.8) | 2 (2-3)                  | 2.5 (2.0-2.9) | 0.592               |
| Time requirement from patient                                            | 3 (2-3)               | 2.7 (2.4-3.1) | 2 (2-3)                  | 2.3 (1.9-2.8) | 0.170               |
| <b>Opportunity Cost<sup>a</sup></b>                                      |                       |               |                          |               |                     |
| Save time for doctor                                                     | 4 (2 -4)              | 3.5 (3.0-3.9) | 2 (2-4)                  | 2.7 (2.2-3.2) | <b>0.035</b>        |
| Save money for doctor                                                    | 2 (2-4)               | 2.8 (2.3-3.2) | 2 (2-2)                  | 2.1 (1.8-2.4) | <b>0.024</b>        |
| <b>Perceived Effectiveness<sup>a</sup></b>                               |                       |               |                          |               |                     |
| Help in providing differentiated care                                    | 4 (3-4)               | 3.7 (3.4-4.0) | 4 (2-4)                  | 3.3 (2.8-3.7) | 0.146               |
| Help patients adhere to treatment                                        | 4 (4-4)               | 3.7 (3.4-4.1) | 4 (3-4)                  | 3.5 (3.1-4.0) | 0.474               |
| <b>Self-Efficacy<sup>a</sup></b>                                         |                       |               |                          |               |                     |
| Confidence monitoring treatment through VOT                              | 4 (3-4)               | 3.4 (3.0-3.8) | 2 (2-4)                  | 2.7 (2.2-3.1) | <b>0.028</b>        |
| Confidence providing differentiated care through VOT                     | 4 (4-4)               | 3.9 (3.8-4.0) | 4 (2-4)                  | 3.1 (2.6-3.6) | <b>0.004</b>        |
| <b>Affective Attitude<sup>a</sup></b>                                    |                       |               |                          |               |                     |
| Addresses problems which patients face                                   | 4 (3-4)               | 3.6 (3.3-3.9) | 2 (2-4)                  | 2.7 (2.2-3.1) | <b>0.004</b>        |
| Be beneficial for doctor's practice and patients                         | 4 (3-4)               | 3.5 (3.2-3.9) | 2 (2-4)                  | 2.8 (2.3-3.3) | <b>0.023</b>        |
| Be relevant for all of doctor's TB patients                              | 2 (2-2)               | 2.4 (2.0-2.7) | 2 (2-2)                  | 2.0 (1.8-2.2) | 0.123               |
| <b>Implementation/Usability<sup>a</sup></b>                              |                       |               |                          |               |                     |
| Doctor's concerns about patient confidentiality                          | 4 (4-4)               | 3.8 (3.4-4.2) | 4 (2-4)                  | 3.3 (2.7-3.9) | 0.270               |
| Doctor's comfort with receiving support from study staff                 | 4 (4-4)               | 3.9 (3.6-4.2) | 4 (2-4)                  | 3.2 (2.8-3.8) | <b>0.044</b>        |

<sup>a</sup>: 1 (Strongly disagree) to 5 (Strongly agree)

<sup>b</sup>: 1 (Very difficult) to 5 (Very easy)
