# Supplementary material for: Assessing private provider perceptions and the acceptability of video observed treatment technology for tuberculosis treatment adherence in three cities across Viet Nam
Source: PubMed Central journal article supplement (PMC8104441; doi:10.1371/journal.pone.0250644), 2021-05-07
Supplement: pone.0250644.s004.pdf [file pone.0250644.s004.pdf]

**S4 Table: Comparison of VOT acceptability among private-sector doctors for Ho Chi Minh City and Ha Noi**

| Constructs of healthcare intervention acceptability and their components  | Would use VOT (N= 34) |               | Would not use VOT (N=17) |               | Mann-Whitney U test |
|---------------------------------------------------------------------------|-----------------------|---------------|--------------------------|---------------|---------------------|
|                                                                           | Median (IQR)          | Mean (95%CI)  | Median (IQR)             | Mean (95%CI)  |                     |
| <b>Ethicality<sup>a</sup></b>                                             |                       |               |                          |               |                     |
| Doctor's belief that observation is best strategy for adherence           | 4 (4-5)               | 4.0 (3.7-4.4) | 4 (3-4)                  | 3.5 (3.0-3.9) | <b>0.025</b>        |
| Doctor's willingness to test new approaches                               | 4 (4-4)               | 4.0 (3.8-4.3) | 4 (3-4)                  | 3.6 (3.2-4.0) | <b>0.041</b>        |
| <b>Intervention Coherence<sup>a</sup></b>                                 |                       |               |                          |               |                     |
| VOT would help identify side effects faster                               | 4 (3-4)               | 3.5 (3.2-3.8) | 2 (2-4)                  | 2.6 (2.2-3.1) | <b>0.004</b>        |
| VOT would help identify people at risk of stopping treatment faster       | 4 (4-4)               | 3.8 (3.5-4.0) | 4 (3-4)                  | 3.6 (3.2-3.9) | 0.387               |
| <b>Burden<sup>b</sup></b>                                                 |                       |               |                          |               |                     |
| VOT time requirement from doctor                                          | 3 (2-4)               | 2.8 (2.5-3.2) | 2 (2-3)                  | 2.4 (2.0-2.8) | 0.144               |
| VOT time requirement from patient                                         | 3 (2-4)               | 2.9 (2.6-3.2) | 2 (2-3)                  | 2.3 (1.9-2.8) | 0.031               |
| <b>Opportunity Cost<sup>a</sup></b>                                       |                       |               |                          |               |                     |
| VOT would save time for doctor                                            | 4 (3 -4)              | 3.6 (3.3-3.9) | 2 (2-4)                  | 2.8 (2.3-3.2) | <b>0.007</b>        |
| VOT would save money for doctor                                           | 3 (2-4)               | 3.0 (2.6-3.3) | 2 (2-2)                  | 2.1 (1.9-2.3) | <b>0.001</b>        |
| <b>Perceived Effectiveness<sup>a</sup></b>                                |                       |               |                          |               |                     |
| VOT would help in providing differentiated care                           | 4 (4-4)               | 3.8 (3.6-4.0) | 3 (2-4)                  | 3.1 (2.7-3.6) | <b>0.008</b>        |
| VOT would help patients adhere to treatment                               | 4 (4-4)               | 3.9 (3.7-4.2) | 4 (3-4)                  | 3.5 (3.0-3.9) | 0.067               |
| <b>Self-Efficacy<sup>a</sup></b>                                          |                       |               |                          |               |                     |
| Doctor's confidence in ability to monitor treatment through VOT           | 4 (3-4)               | 3.5 (3.3-3.8) | 2 (2-3)                  | 2.6 (2.2-3.1) | <b>0.001</b>        |
| Doctor's confidence in ability to provide differentiated care through VOT | 4 (4-4)               | 3.9 (3.7-4.0) | 3 (2-4)                  | 3.0 (2.5-3.5) | <b>0.001</b>        |
| <b>Affective Attitude<sup>a</sup></b>                                     |                       |               |                          |               |                     |
| Addresses problems which patients face                                    | 4 (3-4)               | 3.6 (3.4-3.9) | 2 (2-4)                  | 2.8 (2.3-3.2) | <b>0.001</b>        |
| Be beneficial for doctor's practice and patients                          | 4 (4-4)               | 3.7 (3.4-4.0) | 3 (2-4)                  | 2.9 (2.4-3.4) | <b>0.003</b>        |
| Be relevant for all of doctor's TB patients                               | 2 (2-3)               | 2.4 (2.2-2.7) | 2 (2-2)                  | 2.0 (1.8-2.2) | <b>0.036</b>        |
| <b>Implementation/Usability<sup>a</sup></b>                               |                       |               |                          |               |                     |
| Doctor's concerns about patient confidentiality                           | 4 (2-4)               | 3.4 (3.1-3.8) | 4 (2-4)                  | 3.3 (2.7-3.9) | 0.776               |
| Doctor's comfort with receiving support from study staff                  | 4 (4-4)               | 3.9 (3.7-4.1) | 4 (2-4)                  | 3.3 (2.9-3.8) | <b>0.039</b>        |

<sup>a</sup>: 1 (Strongly Disagree) to 5 (Strong Agree)

<sup>b</sup>: 1 (Very Difficult) to 5 (Very Easy)
