# Supplementary material for: Assessing private provider perceptions and the acceptability of video observed treatment technology for tuberculosis treatment adherence in three cities across Viet Nam
Source: PubMed Central journal article supplement (PMC8104441; doi:10.1371/journal.pone.0250644), 2021-05-07
Supplement: pone.0250644.s005.pdf [file pone.0250644.s005.pdf]

**S5 Table: Constructs of acceptability associated with the willingness to use VOT in Ha Noi and Hai Phong**

| Constructs of healthcare intervention acceptability and their components | Would use VOT<br>(n= 43) |                 | Would not use VOT<br>(n=2) |                 | Mann-Whitney<br><i>U</i> test |
|--------------------------------------------------------------------------|--------------------------|-----------------|----------------------------|-----------------|-------------------------------|
|                                                                          | Median<br>(IQR)          | Mean<br>(95%CI) | Median<br>(IQR)            | Mean<br>(95%CI) |                               |
| <b>Ethicality<sup>a</sup></b>                                            |                          |                 |                            |                 |                               |
| Belief that observation is best strategy for adherence                   | 5 (4-5)                  | 4.5 (4.4-4.7)   | 3.5 (3-4)                  | 3.5 (2.5-4.5)   | <b>0.041</b>                  |
| Willingness to test new approaches                                       | 4 (4-5)                  | 4.3 (4.1-4.4)   | 2.5 (2-3)                  | 2.5 (1.5-3.5)   | <b>0.005</b>                  |
| <b>Intervention Coherence<sup>a</sup></b>                                |                          |                 |                            |                 |                               |
| Identify side effects faster                                             | 4 (3-4)                  | 3.7 (3.4-4.0)   | 2 (2-2)                    | 2.0 (2.0-2.0)   | <b>0.021</b>                  |
| Identify people at risk of stopping treatment faster                     | 4 (4-4)                  | 4.0 (3.8-4.2)   | 4 (4-4)                    | 4.0 (4.0-4.0)   | 0.869                         |
| <b>Burden<sup>b</sup></b>                                                |                          |                 |                            |                 |                               |
| Time requirement from doctor                                             | 4 (3-4)                  | 3.6 (3.4-3.8)   | 2 (2-2)                    | 2.0 (2.0-2.0)   | <b>0.014</b>                  |
| Time requirement from patient                                            | 3 (3-4)                  | 3.2 (3.0-3.4)   | 2.5 (2-3)                  | 2.5 (1.5-3.5)   | 0.215                         |
| <b>Opportunity Cost<sup>a</sup></b>                                      |                          |                 |                            |                 |                               |
| Save time for doctor                                                     | 4 (4-4)                  | 3.9 (3.6-4.1)   | 3 (2-4)                    | 3.0 (1.0-5.0)   | 0.202                         |
| Save money for doctor                                                    | 3 (3-4)                  | 3.3 (3.0-3.6)   | 2 (2-2)                    | 2.0 (2.0-2.0)   | <b>0.047</b>                  |
| <b>Perceived Effectiveness<sup>a</sup></b>                               |                          |                 |                            |                 |                               |
| Help in providing differentiated care                                    | 4 (4-4)                  | 4.0 (3.7-4.2)   | 2 (2-2)                    | 2.0 (2.0-2.0)   | <b>0.008</b>                  |
| Help patients adhere to treatment                                        | 4 (4-4)                  | 4.0 (3.8-4.2)   | 3 (2-2)                    | 3.0 (3.8-5.0)   | 0.136                         |
| <b>Self-Efficacy<sup>a</sup></b>                                         |                          |                 |                            |                 |                               |
| Confidence monitoring treatment through VOT                              | 4 (4-4)                  | 3.8 (3.6-4.0)   | 2.5 (2-3)                  | 2.5 (1.5-3.5)   | <b>0.012</b>                  |
| Confidence providing differentiated care through VOT                     | 4 (4-4)                  | 3.8 (3.6-4.0)   | 2 (2-2)                    | 2.0 (2.0-2.0)   | <b>0.002</b>                  |
| <b>Affective Attitude<sup>a</sup></b>                                    |                          |                 |                            |                 |                               |
| Addresses problems which patients face                                   | 4 (4-4)                  | 3.9 (3.7-4.1)   | 3.5 (3-4)                  | 3.5 (2.5-4.5)   | 0.270                         |
| Be beneficial for doctor's practice and patients                         | 4 (4-4)                  | 4.0 (3.8-4.2)   | 3.5 (3-4)                  | 3.5 (2.5-4.5)   | 0.139                         |
| Be relevant for all of doctor's TB patients                              | 3 (2-3)                  | 2.8 (2.6-3.1)   | 2 (2-2)                    | 2.0 (2.0-2.0)   | 0.127                         |
| <b>Implementation/Usability<sup>a</sup></b>                              |                          |                 |                            |                 |                               |
| Doctor's concerns about patient confidentiality                          | 2 (2-4)                  | 2.8 (2.5-3.1)   | 3 (2-4)                    | 3.0 (1.0-5.0)   | 0.778                         |
| Doctor's comfort with receiving support from study staff                 | 4 (4-4)                  | 4.0 (3.7-4.2)   | 4 (4-4)                    | 4.0 (4.0-4.0)   | 0.942                         |

<sup>a</sup>: 1 (Strongly Disagree) to 5 (Strongly Agree)

<sup>b</sup>: 1 (Very Difficult) to 5 (Very Easy)
