# Supplementary material for: Assessing private provider perceptions and the acceptability of video observed treatment technology for tuberculosis treatment adherence in three cities across Viet Nam
Source: PubMed Central journal article supplement (PMC8104441; doi:10.1371/journal.pone.0250644), 2021-05-07
Supplement: pone.0250644.s006.pdf [file pone.0250644.s006.pdf]

**S8 Table: Adjusting for multiple comparisons using the Holm-Bonferroni sequential correction**

|                                                                              | P-value       | adjusted $\alpha$ using the Holm-Bonferroni correction |
|------------------------------------------------------------------------------|---------------|--------------------------------------------------------|
| <b>Characteristics of private providers in the survey stratified by city</b> |               |                                                        |
| <b>Sex</b>                                                                   |               |                                                        |
| Hai Phong vs Ha Noi                                                          | 0.4200        | 0.0500                                                 |
| Ha Noi vs HCMC                                                               | <b>0.0030</b> | 0.0167                                                 |
| Hai Phong vs HCMC                                                            | <b>0.0140</b> | 0.0250                                                 |
| <b>Age</b>                                                                   |               |                                                        |
| Hai Phong vs Ha Noi                                                          | 0.6580        |                                                        |
| Ha Noi vs HCMC                                                               | 0.0820        | 0.0250                                                 |
| Hai Phong vs HCMC                                                            | <b>0.0050</b> | 0.0167                                                 |
| <b>Overall attitudes of private providers towards VOT</b>                    |               |                                                        |
| <b>Belief that observation is best strategy for adherence</b>                |               |                                                        |
| Hai Phong vs Ha Noi                                                          | 0.3780        |                                                        |
| Ha Noi vs HCMC                                                               | 0.0810        | 0.0250                                                 |
| Hai Phong vs HCMC                                                            | <b>0.0020</b> | 0.0167                                                 |
| <b>Willingness to test new approaches</b>                                    |               |                                                        |
| Hai Phong vs Ha Noi                                                          | 0.0480        |                                                        |
| Ha Noi vs HCMC                                                               | 0.8610        | 0.0250                                                 |
| Hai Phong vs HCMC                                                            | <b>0.0170</b> | 0.0167                                                 |
| <b>Identify people at risk of stopping treatment faster</b>                  |               |                                                        |
| Hai Phong vs Ha Noi                                                          | 0.4670        |                                                        |
| Ha Noi vs HCMC                                                               | 0.3300        | 0.0250                                                 |
| Hai Phong vs HCMC                                                            | <b>0.0060</b> | 0.0167                                                 |
| <b>Time requirement from doctor</b>                                          |               |                                                        |
| Hai Phong vs Ha Noi                                                          | 0.4170        | 0.0500                                                 |
| Ha Noi vs HCMC                                                               | <b>0.0070</b> | 0.0250                                                 |
| Hai Phong vs HCMC                                                            | <b>0.0000</b> | 0.0167                                                 |
| <b>Time requirement from patients</b>                                        |               |                                                        |
| Hai Phong vs Ha Noi                                                          | 0.4760        |                                                        |
| Ha Noi vs HCMC                                                               | 0.1230        | 0.0250                                                 |
| Hai Phong vs HCMC                                                            | <b>0.0090</b> | 0.0167                                                 |
| <b>Save time for doctor</b>                                                  |               |                                                        |
| Hai Phong vs Ha Noi                                                          | <b>0.0180</b> | 0.0250                                                 |
| Ha Noi vs HCMC                                                               | <b>0.0410</b> | 0.0500                                                 |
| Hai Phong vs HCMC                                                            | <b>0.0010</b> | 0.0167                                                 |
| <b>Save money for doctor</b>                                                 |               |                                                        |

|                                                               |               |        |
|---------------------------------------------------------------|---------------|--------|
| Hai Phong vs Ha Noi                                           | 0.3950        | 0.0500 |
| Ha Noi vs HCMC                                                | <b>0.0060</b> | 0.0250 |
| Hai Phong vs HCMC                                             | <b>0.0000</b> | 0.0167 |
| <b>Confidence in ability to monitor treatment through VOT</b> |               |        |
| Hai Phong vs Ha Noi                                           | 0.2250        |        |
| Ha Noi vs HCMC                                                | 0.1460        | 0.0250 |
| Hai Phong vs HCMC                                             | <b>0.0000</b> | 0.0167 |
| <b>Addresses problems which patients face</b>                 |               |        |
| Hai Phong vs Ha Noi                                           | 0.3060        |        |
| Ha Noi vs HCMC                                                | 0.0910        | 0.0250 |
| Hai Phong vs HCMC                                             | <b>0.0030</b> | 0.0167 |
| <b>Beneficial for doctor's practice and patients</b>          |               |        |
| Hai Phong vs Ha Noi                                           | 0.4070        |        |
| Ha Noi vs HCMC                                                | 0.0540        | 0.0250 |
| Hai Phong vs HCMC                                             | <b>0.0000</b> | 0.0167 |
| <b>Relevant for all of doctor's TB patients</b>               |               |        |
| Hai Phong vs Ha Noi                                           | 0.0590        |        |
| Ha Noi vs HCMC                                                | 0.0320        | 0.0250 |
| Hai Phong vs HCMC                                             | <b>0.0000</b> | 0.0167 |
| <b>Concerns about patient confidentiality</b>                 |               |        |
| Hai Phong vs Ha Noi                                           | 0.3980        |        |
| Ha Noi vs HCMC                                                | 0.1030        | 0.0250 |
| Hai Phong vs HCMC                                             | <b>0.0050</b> | 0.0167 |
| <b>Provider willingness to use VOT</b>                        |               |        |
| Hai Phong vs Ha Noi                                           | 0.1370        | 0.0500 |
| Ha Noi vs HCMC                                                | <b>0.0210</b> | 0.0250 |
| Hai Phong vs HCMC                                             | <b>0.0000</b> | 0.0167 |
