# Supplementary material for: Assessing private provider perceptions and the acceptability of video observed treatment technology for tuberculosis treatment adherence in three cities across Viet Nam
Source: PubMed Central journal article supplement (PMC8104441; doi:10.1371/journal.pone.0250644), 2021-05-07
Supplement: pone.0250644.s008.pdf [file pone.0250644.s008.pdf]

Private Provider Acceptability Survey in English

Date of survey: \_\_\_ - \_\_\_ - \_\_\_\_\_ Name of interviewer: \_\_\_\_\_

Name of doctor: \_\_\_\_\_ Gender: [ ] M [ ] F District/ward: \_\_\_\_\_

Year of birth: \_\_\_\_\_ Year graduated medical school: \_\_\_\_\_ How many years have you had your private clinic: \_\_\_\_\_ years

Video Observed Therapy Demo

Ethicality: The extent to which the intervention has a good fit with an individual's value system

1. Observing a patient taking his/her medicine is the best strategy for ensuring TB treatment adherence and completion.

[ ] Strongly disagree [ ] Disagree [ ] Neither disagree nor agree [ ] Agree [ ] Strongly agree [ ] Refuse

1a. If the above question = Strongly disagree or disagree: What do you feel is the best strategy for ensuring TB treatment adherence and completion?

[Empty text box for response]

2. I am willing to test new treatment approaches to help my TB patients regain their health.

[ ] Strongly disagree [ ] Disagree [ ] Neither disagree nor agree [ ] Agree [ ] Strongly agree [ ] Refuse

Intervention Coherence: The extent to which the participant understands the intervention and how it works

3. By reviewing videos each day, I would be able to identify and address any medication side effects more quickly than the routine care provided in my private clinic.

[ ] Strongly disagree [ ] Disagree [ ] Neither disagree nor agree [ ] Agree [ ] Strongly agree [ ] Refuse

4. By reviewing videos each day, I would be able to identify which TB patients were at risk of stopping their TB treatment more quickly than the routine care provided in my clinic.

[ ] Strongly disagree [ ] Disagree [ ] Neither disagree nor agree [ ] Agree [ ] Strongly agree [ ] Refuse

Burden: The perceived amount of effort that is required to participate in the intervention

5. The time commitment required of me to review videos of my TB patients every day would be...

[ ] Very difficult [ ] Difficult [ ] Neither difficult nor easy [ ] Easy [ ] Very Easy [ ] Refuse

6. The time commitment required of my TB patients to make and upload videos every day would be...

[ ] Very difficult [ ] Difficult [ ] Neither difficult nor easy [ ] Easy [ ] Very Easy [ ] Refuse

## Private Provider Acceptability Survey in English

**Opportunity Cost:** *The extent to which benefits, profits or values must be given up to engage in the intervention*

7. Using a Video Observed Therapy (VOT) platform would save me **time** compared to the routine follow up in my private clinic.

Strongly disagree    Disagree    Neither disagree nor agree    Agree    Strongly agree    Refuse

8. Using a Video Observed Therapy (VOT) platform would save me **money** compared to the routine follow up in my private clinic.

Strongly disagree    Disagree    Neither disagree nor agree    Agree    Strongly agree    Refuse

**Perceived Effectiveness:** *The extent to which the intervention is perceived as likely to achieve its purpose*

9. Monitoring TB treatment progress via an online Video Observed Therapy (VOT) platform would allow me to provide individualized, tailored care to my TB patients.

Strongly disagree    Disagree    Neither disagree nor agree    Agree    Strongly agree    Refuse

10. Using a Video Observed Therapy (VOT) platform would help more of my patients adhere to and complete their TB treatment.

Strongly disagree    Disagree    Neither disagree nor agree    Agree    Strongly agree    Refuse

**Self-Efficacy:** *The participant's confidence that they can perform the behavior(s) required to participate in the intervention*

11. I feel confident about my ability to regularly monitor the treatment adherence and progress of my TB patients using a Video Observed Therapy (VOT) platform.

Strongly disagree    Disagree    Neither disagree nor agree    Agree    Strongly agree    Refuse

12. I feel confident about my ability to differentiate the care I provide to my TB patients based on information collected from a Video Observed Therapy (VOT) platform.

Strongly disagree    Disagree    Neither disagree nor agree    Agree    Strongly agree    Refuse

### Implementation / Usability

13. I am worried that a Video Observed Therapy (VOT) platform would not be able to keep my patients' information strictly confidential.

Strongly disagree    Disagree    Neither disagree nor agree    Agree    Strongly agree    Refuse

14. I would feel comfortable having a dedicated staff member (a nurse or health worker) review videos each day and assist me with communicating with my TB patients regarding their side effects and treatment adherence.

**Private Provider Acceptability Survey in English**

Strongly disagree     Disagree     Neither disagree nor agree     Agree     Strongly agree     Refuse

14a. If the above question = Strongly disagree or disagree – Why do you not feel comfortable with a dedicated staff member assisting you with video reviews and communication?

15. I would feel comfortable sharing data about TB treatment adherence from a Video Observed Therapy (VOT) platform with the National TB Program.

Strongly disagree     Disagree     Neither disagree nor agree     Agree     Strongly agree     Refuse

**Affective Attitude:** *How an individual feels about the intervention*

16. Video Observed Therapy (VOT) addresses a problem which my patients face.

Strongly disagree     Disagree     Neither disagree nor agree     Agree     Strongly agree     Refuse

17. I believe that using a Video Observed Therapy (VOT) platform would be beneficial to my private practice and to my patients.

Strongly disagree     Disagree     Neither disagree nor agree     Agree     Strongly agree     Refuse

18. Video Observed Therapy (VOT) would be relevant to all the TB patients treated in my private clinic.

Strongly disagree     Disagree     Neither disagree nor agree     Agree     Strongly agree     Refuse

18a. If the above question = Strongly disagree or disagree – For which patients is this treatment support approach most applicable?

19. If given the opportunity, I would use a VOT platform to help manage my patients

Yes     No     Refuse

**Private Provider Practice**

20. In the past month, have you started anyone on treatment for drug-sensitive TB at your private practice?

Yes     No     Refuse

20a. If yes, how many TB patients? \_\_\_\_\_

21. In the past month, have you started anyone on treatment for MDR-TB at your private practice?

Yes     No     Refuse

22. Do you currently host clinic hours in a government facility?

Yes     No     Refuse

**Private Provider Acceptability Survey in English**

22a. If yes to the above question, in which type government facility do you work?

- City-level                       District-level       Ward-level       Military health facility  
 (such as PNT or 115 People's Hospital)    (Such as DGH or DTU)    (such as CHS)  
 Other: \_\_\_\_\_

23. How did you learn about TB treatment practices?

- Medical school       Colleagues       Internet       Gov't guidelines  
 PNT hospital       Other: \_\_\_\_\_

24. What information sources do you use to keep up-to-date on TB diagnosis and treatment?

- Books       Internet       Scientific journal       Continuing medical education       Pharmaceutical reps  
 Other: \_\_\_\_\_

25. For an average suspect which method(s) do you primarily use to diagnose TB? *Check all that apply*

- Clinical evaluation       Chest X-ray       Smear microscopy       Antibiotic Trial       Mantoux/TST  
 Xpert MTB/RIF       Culture       Serological test (IGRA)       CBC or ESR  
 Other: \_\_\_\_\_

26. Write a prescription for a previously untreated adult case of sputum-positive, drug-sensitive, pulmonary tuberculosis weighing 50 Kg (110 lbs).

| Drugs | Dosage | Duration |
|-------|--------|----------|
|       |        |          |

27. Ensuring my TB patients adhere to and complete treatment is a challenge in my private clinic.

- Strongly disagree    Disagree    Neither disagree nor agree    Agree    Strongly agree                      Refuse

28. When you start someone on TB treatment, which type of follow up is most common for your average patient for the first two months (intensive phase)?

- Patient takes medicines at home with daily check ins from me  
 Patient takes medicines at home with weekly check ins from me  
 Patient takes medicines at home with monthly check ins from me  
 Patient takes medicines at home with no supervision

29. If a TB patient stops visiting you before his/her treatment is complete, what do you or your staff currently do to encourage them to comeback?

- Phone call                       Home visit       Nothing                                               Refuse  
 Other: \_\_\_\_\_
