# Supplementary material for: Assessing private provider perceptions and the acceptability of video observed treatment technology for tuberculosis treatment adherence in three cities across Viet Nam
Source: PubMed Central journal article supplement (PMC8104441; doi:10.1371/journal.pone.0250644), 2021-05-07
Supplement: pone.0250644.s009.pdf [file pone.0250644.s009.pdf]

## Private Provider Acceptability Survey in Vietnamese

Ngày khảo sát: \_\_\_\_ - \_\_\_\_ - \_\_\_\_      Họ tên phỏng vấn viên: \_\_\_\_\_

Họ tên bác sĩ: \_\_\_\_\_      Giới tính:  Nam  Nữ      Quận/Phường: \_\_\_\_\_

Năm sinh: \_\_\_\_ - \_\_\_\_ - \_\_\_\_      Năm tốt nghiệp ĐH Y: \_\_\_\_ - \_\_\_\_ - \_\_\_\_      Thời gian hoạt động của phòng khám của BS: \_\_\_\_ năm

### Giới thiệu Ứng dụng ghi hình trong giám sát điều trị

**Đạo đức:** *Đánh giá mức độ sự phù hợp của can thiệp này với những giá trị đạo đức cá nhân*

1. Quan sát bệnh nhân uống thuốc là chiến lược tốt nhất để đảm bảo sự tuân thủ và hoàn thành điều trị lao.

                                                                                                            

Rất không đồng ý      Không đồng ý      Bình thường      Đồng ý      Rất đồng ý      Từ chối

↓                                      ↓

1a. Nếu Câu trên= Rất không đồng ý hay Không đồng ý– BS cảm thấy chiến lược nào là tốt nhất để đảm bảo sự tuân thủ và hoàn thành điều trị lao?

2. BS sẵn sàng thử nghiệm các cách tiếp cận điều trị mới để giúp bệnh nhân hồi phục sức khỏe.

                                                                                                            

Rất không đồng ý      Không đồng ý      Bình thường      Đồng ý      Rất đồng ý      Từ chối

**Tính chặt chẽ của can thiệp:** *Mức độ BS hiểu về can thiệp và cách thức can thiệp được thực hiện*

3. Dùng clip của bệnh nhân gửi hàng ngày, BS sẽ có thể phát hiện và xử trí các tác dụng phụ, biến cố bất lợi nhanh hơn so với các bệnh nhân đến khám ở phòng khám của BS theo thường lệ.

                                                                                                            

Rất không đồng ý      Không đồng ý      Bình thường      Đồng ý      Rất đồng ý      Từ chối

4. Dùng clip của bệnh nhân gửi hàng ngày, BS sẽ có thể phát hiện bệnh nhân có nguy cơ bỏ trị nhanh hơn so với việc bệnh nhân đến khám ở phòng khám của BS theo thường lệ.

                                                                                                            

Rất không đồng ý      Không đồng ý      Bình thường      Đồng ý      Rất đồng ý      Từ chối

**Công việc thêm:** *Nhận thức về công sức cần cho việc tham gia vào can thiệp này*

5. BS cảm thấy việc sắp xếp thời gian để **BS** xem đoạn phim của bệnh nhân của mình hàng ngày ...

                                                                                                            

Rất khó      Khó      Không khó không dễ      Dễ      Rất dễ      Từ chối

6. BS cảm thấy yêu cầu về thời gian để **bệnh nhân** quay phim và tải video mỗi ngày là ...

                                                                                                            

Rất khó      Khó      Không khó không dễ      Dễ      Rất dễ      Từ chối

**Chi phí cơ hội dự kiến:** *Đánh giá mức độ lợi ích, lợi nhuận và giá trị bỏ ra khi tham gia vào can thiệp*

## Private Provider Acceptability Survey in Vietnamese

7. Sử dụng ứng dụng ghi hình trong giám sát điều trị (VOT) sẽ tiết kiệm **thời gian** của BS so với việc hẹn bệnh nhân đi tái khám nhiều lần tại phòng khám của BS.

Rất không đồng ý       Không đồng ý       Bình thường       Đồng ý       Rất đồng ý       Từ chối

8. Sử dụng ứng dụng ghi hình trong giám sát điều trị (VOT) sẽ tiết kiệm **chi phí** của BS so với việc hẹn bệnh nhân đi tái khám nhiều lần tại phòng khám của BS.

Rất không đồng ý       Không đồng ý       Bình thường       Đồng ý       Rất đồng ý       Từ chối

**Hiệu quả dự kiến:** *Đánh giá mức độ can thiệp sẽ đạt được hiệu quả như dự kiến*

9. Giám sát tiến trình điều trị của bệnh nhân qua ứng dụng trực tuyến ghi hình trong giám sát điều trị (VOT) sẽ cho phép bác sĩ có các biện pháp chăm sóc điều trị phù hợp cho từng bệnh nhân.

Rất không đồng ý       Không đồng ý       Bình thường       Đồng ý       Rất đồng ý       Từ chối

10. Sử dụng Ứng dụng ghi hình trong giám sát điều trị (VOT) sẽ giúp tăng số lượng bệnh nhân tuân thủ và hoàn thành điều trị lao.

Rất không đồng ý       Không đồng ý       Bình thường       Đồng ý       Rất đồng ý       Từ chối

**Tự tin vào khả năng bản thân:** *Người tham gia tự tin vào khả năng của bản thân rằng họ có thể thực hiện các hoạt động cần thiết để tham gia vào can thiệp này*

11. Bác sĩ tin là mình có thể theo dõi thường xuyên sự tuân thủ điều trị và sự tiến triển điều trị của bệnh nhân qua việc sử dụng ứng dụng ghi hình trong điều trị lao (VOT).

Rất không đồng ý       Không đồng ý       Bình thường       Đồng ý       Rất đồng ý       Từ chối

12. Bác sĩ tin là mình sẽ chăm sóc điều trị và cung cấp dịch vụ theo y học cá nhân cho bệnh nhân tốt hơn dựa trên thông tin thu thập từ Ứng dụng ghi hình trong giám sát điều trị.

Rất không đồng ý       Không đồng ý       Bình thường       Đồng ý       Rất đồng ý       Từ chối

### Thực hiện / Khả năng sử dụng

13. BS lo lắng ứng dụng ghi hình trong giám sát điều trị lao (VOT) sẽ không giữ được bí mật thông tin bệnh nhân.

Rất không đồng ý       Không đồng ý       Bình thường       Đồng ý       Rất đồng ý       Từ chối

14. BS cảm thấy thoải mái khi có nhân viên nghiên cứu hỗ trợ (y tá hoặc nhân viên y tế) kiểm tra video mỗi ngày và hỗ trợ bác sĩ trong việc giao tiếp với bệnh nhân về việc tuân thủ điều trị và các tác dụng phụ.

Rất không đồng ý       Không đồng ý       Bình thường       Đồng ý       Rất đồng ý       Từ chối

14a. Nếu câu hỏi trên = Rất không đồng ý hay Không đồng ý – Tại sao bác sĩ cảm thấy không thoải mái với việc nhân viên hỗ trợ mình trong việc kiểm tra video và giao tiếp với bệnh nhân?
